# Supplementary material for: Mass Relapse Prevention to Reduce Transmission of Plasmodium vivax— A Systematic Review
Source: PubMed Central journal article supplement (PMC10993785; doi:10.4269/ajtmh.22-0727), 2023-12-20
Supplement: tpmd220727.SD1.pdf [file tpmd220727.SD1.pdf]

Supplemental Data

**Mass Relapse Prevention to Reduce Transmission of  
*Plasmodium vivax* - A Systematic Review**

Monica P. Shah, Nelli Westercamp, Kim A. Lindblade and Jimee Hwang

Supplemental Table 1. Search strategy

**Search Name:** Cochrane Central Register of Controlled Trials

| ID | Search                                                                         |
|----|--------------------------------------------------------------------------------|
| #2 | "antimalarial":ti,ab,kw (Word variations have been searched)                   |
| #3 | malaria:ti,ab,kw (Word variations have been searched)                          |
| #4 | MeSH descriptor: [Malaria] explode all trees                                   |
| #5 | MeSH descriptor: [Antimalarials] explode all trees                             |
| #6 | #2 or #3 or #4 or #5                                                           |
| #7 | "mass chemoprophylaxis" or "mass drug administration" or "mass administration" |
| #8 | "mass screening and treatment"                                                 |
| #9 | "mass treatment"                                                               |

**Database:** Embase 1947-Present, updated daily

|    |                                                                                      |
|----|--------------------------------------------------------------------------------------|
| 1  | malaria/ or malaria control/                                                         |
| 2  | antimalarial agent/ or antimalarial*.mp.                                             |
| 3  | (malaria or antimalarial*).ab. or (malaria or antimalarial*).ti.                     |
| 4  | 1 or 2 or 3                                                                          |
| 5  | ("mass chemoprophylaxis" or "mass drug administration" or "mass administration").mp. |
| 6  | mass drug administration.mp.                                                         |
| 7  | mass treatment.mp.                                                                   |
| 8  | "mass screening and treatment".mp.                                                   |
| 9  | 5 or 6 or 7 or 8                                                                     |
| 10 | 4 and 9                                                                              |

**Pubmed Search history**

| Search | Query                                                                                                |
|--------|------------------------------------------------------------------------------------------------------|
| #1     | malaria Field: Title/Abstract                                                                        |
| #2     | antimalarial*or anti-malarial* Field:Title/Abstract                                                  |
| #3     | (malaria[MeSH Terms]) OR antimalarials[MeSH Terms]                                                   |
| #4     | #1 or #2 or #3                                                                                       |
| #5     | ((mass chemoprophylaxis) OR mass drug administration) OR mass administration<br>Field:Title/Abstract |

|     |                                                                        |
|-----|------------------------------------------------------------------------|
| #6  | "mass screening and treatment" Field: Title/Abstract                   |
| #7  | (MDA[Title/Abstract] OR MSAT[Title/Abstract] OR iMSaT[Title/Abstract]) |
| #8  | mass drug administration[MeSH Terms]                                   |
| #9  | #5 or #6 or #7 or #8                                                   |
| #10 | #4 and #9                                                              |

Database : **LILACS**

|            |                                                                          |
|------------|--------------------------------------------------------------------------|
| Search on: | <b>malaria or antimalarial\$ [Words] and mass administration [Words]</b> |
|------------|--------------------------------------------------------------------------|

Supplemental Table 2. List of studies excluded after full review and primary reasons for exclusion

| <b>Study</b>                     | <b>Reason for exclusion</b>                                                                       |
|----------------------------------|---------------------------------------------------------------------------------------------------|
| Aliev 2000 <sup>1</sup>          | Inadequate comparator arm: Background interventions not balanced in both arms                     |
| Aliev 2001 <sup>2</sup>          | Inadequate comparator arm: Background interventions not balanced in both arms                     |
| Cáceres 2004a <sup>3</sup>       | Wrong intervention: MDA with a blood-stage schizonticide and a hypnozoiticide drug                |
| Cáceres 2004b <sup>4</sup>       | Wrong intervention: MDA with a blood-stage schizonticide and a hypnozoiticide drug                |
| Cáceres 2005 <sup>5</sup>        | Wrong intervention: MDA with a blood-stage schizonticide and a hypnozoiticide drug                |
| Cáceres 2008 <sup>6</sup>        | Wrong intervention: MDA with a blood-stage schizonticide and a hypnozoiticide drug                |
| Chagin 1979 <sup>7</sup>         | Insufficient outcomes: No outcomes, contextual factors, or mathematical modeling results reported |
| Henderson 1934 <sup>8</sup>      | Wrong intervention: Not an 8-aminoquinoline                                                       |
| Hsiang 2013 <sup>9</sup>         | Wrong intervention: MDA with a blood-stage schizonticide and a hypnozoiticide drug                |
| Khaing 2016 <sup>10</sup>        | Wrong intervention: MDA with a blood-stage schizonticide and a hypnozoiticide drug                |
| Landier 2018 <sup>11</sup>       | Wrong intervention: MDA with a blood-stage schizonticide and a hypnozoiticide drug                |
| Levenson 1943 <sup>12</sup>      | Wrong intervention: Not an 8-aminoquinoline                                                       |
| Lysenko 1960 <sup>13</sup>       | Wrong intervention: Not mass relapse prevention                                                   |
| Lysenko 1973a <sup>14</sup>      | Wrong intervention: MDA with a blood-stage schizonticide and a hypnozoiticide drug                |
| Lysenko 1973b <sup>15</sup>      | Inadequate comparator arm: Control group criteria not met                                         |
| Marasinghe 2020 <sup>16</sup>    | Wrong intervention: MDA with a blood-stage schizonticide and a hypnozoiticide drug                |
| Polevoy 1975 <sup>17</sup>       | Wrong intervention: MDA with a blood-stage schizonticide and a hypnozoiticide drug                |
| Singh 1968 <sup>18</sup>         | Wrong intervention: MDA with a blood-stage schizonticide and a hypnozoiticide drug                |
| von Seidlein 2019a <sup>19</sup> | Wrong intervention: MDA with a blood-stage schizonticide and a hypnozoiticide drug                |
| von Seidlein 2019b <sup>20</sup> | Wrong intervention: MDA with a blood-stage schizonticide and a hypnozoiticide drug                |
| Wojnarski 2016 <sup>21</sup>     | Wrong intervention: Not a treatment dose of an 8-aminoquinoline                                   |
| Zhang 2014 <sup>22</sup>         | Insufficient outcomes: No outcomes, contextual factors, or mathematical modeling results reported |

Notes: MDA = mass drug administration

Supplemental Figure 1. Risk of bias for included studies

|              | Failure to develop and apply appropriate eligibility criteria (inclusion of control population) | Flawed measurement exposure | Flawed measurement of outcome: Incidence | Flawed measurement of outcome: Prevalence | Flawed measurement of outcome: Adverse events | Failure to adequately control confounding | Incomplete follow-up |
|--------------|-------------------------------------------------------------------------------------------------|-----------------------------|------------------------------------------|-------------------------------------------|-----------------------------------------------|-------------------------------------------|----------------------|
| Pant 2014    | +                                                                                               | +                           | ?                                        | -                                         | -                                             | -                                         | +                    |
| Rybalka 1979 | -                                                                                               | -                           | -                                        |                                           |                                               | -                                         | ?                    |
